# Supplementary material
Source: publisher figshare collection journal article supplement (https://acs.figshare.com/ndownloader/files/3860554)
Supplement: Supplementary file 1 [file 3860554]

# Supporting Information

## Advanced Structural Engineering of Nanoporous Photonic Structures: Tailoring Nanopore Architecture to Enhance Sensing Properties

Tushar Kumeria<sup>1</sup>, Abel Santos<sup>1\*</sup>, Mohammad Mahbubur Rahman<sup>1,2</sup>, Josep Ferré-Borrull<sup>2</sup>,  
Lluís F. Marsal<sup>2</sup> and Dusan Losic<sup>1</sup>

<sup>1</sup> School of Chemical Engineering – The University of Adelaide, Adelaide, Australia

<sup>2</sup> Departament d'Enginyeria Electrònica, Elèctrica i Automàtica – Universitat Rovira i Virgili, Tarragona, Spain

\*E-Mail: [abel.santos@adelaide.edu.au](mailto:abel.santos@adelaide.edu.au)

Number of Pages = 3

Number of Figures = 2

Number of Tables = 0

## S1. Anodization profiles used to produce NAA-ST and NAA-RF platforms

Figures S1a and b illustrates the anodization profiles applied to produce NAA-ST and NAA-RF platforms. Whereas NAA-ST platforms were produced by anodization at constant voltage, NAA platforms were fabricated by a pseudosinusoidal anodization profile, in which the anodization profile was shifted between high and low anodization voltages.

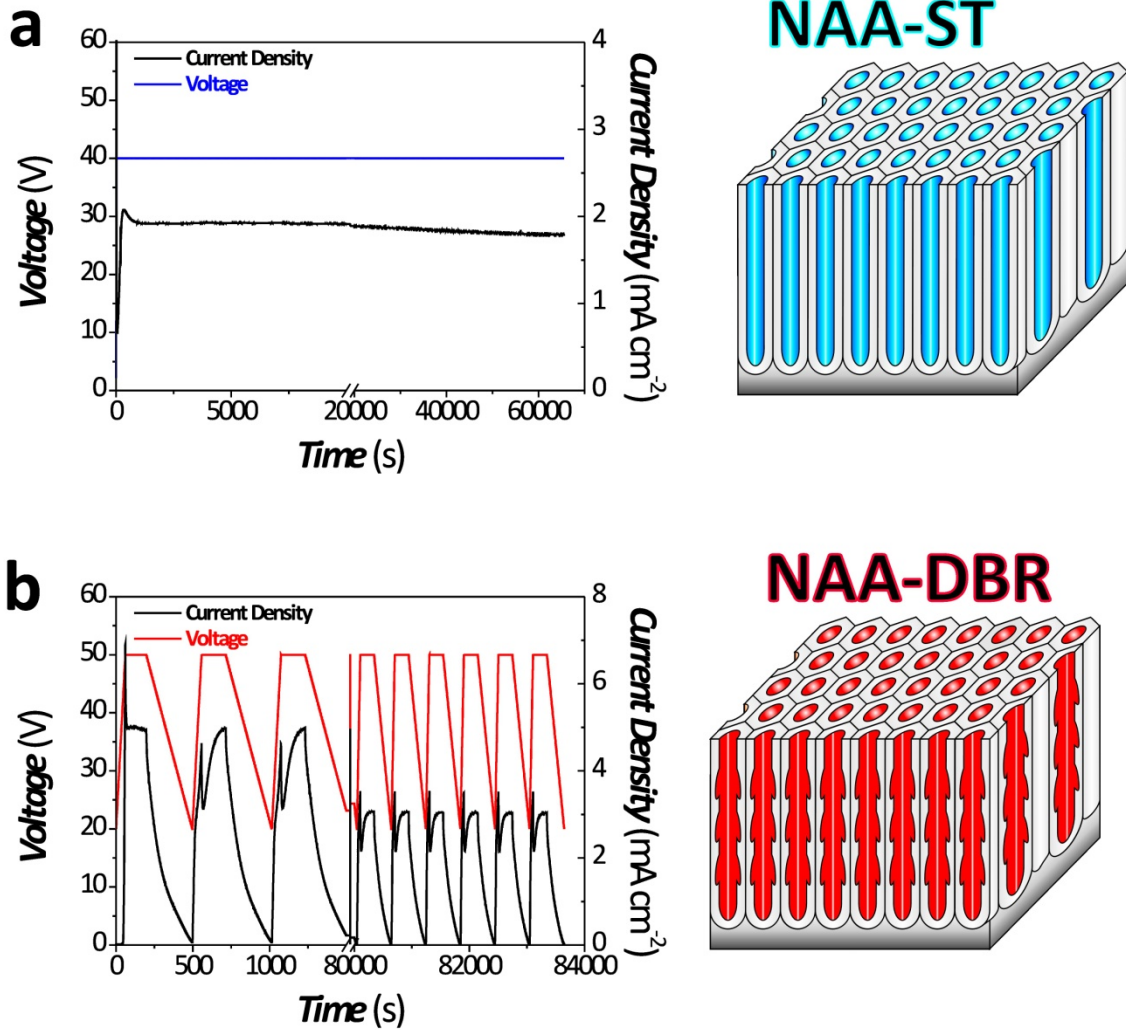

**Figure S1.** Anodization profiles and structural illustrations of (a) NAA-ST and (b) NAA-RF platforms.

## S2. Real-time monitoring of changes in $\Delta OT_{eff}$ and $\Delta \lambda_{peak}$ in NAA-ST and NAA-RF platforms

The optical properties of NAA-ST and NAA-RF platforms were assessed in real-time by changing the effective medium of these nanoporous structures. To this end, their nanopores were infiltrated with different aqueous solutions of glucose from 0.01 to 1.00 M (**Figure S2**). Then, changes in the effective medium of these nanoporous platforms produced changes in  $\Delta OT_{eff}$  and  $\Delta \lambda_{peak}$ , which were used as the sensing parameters.

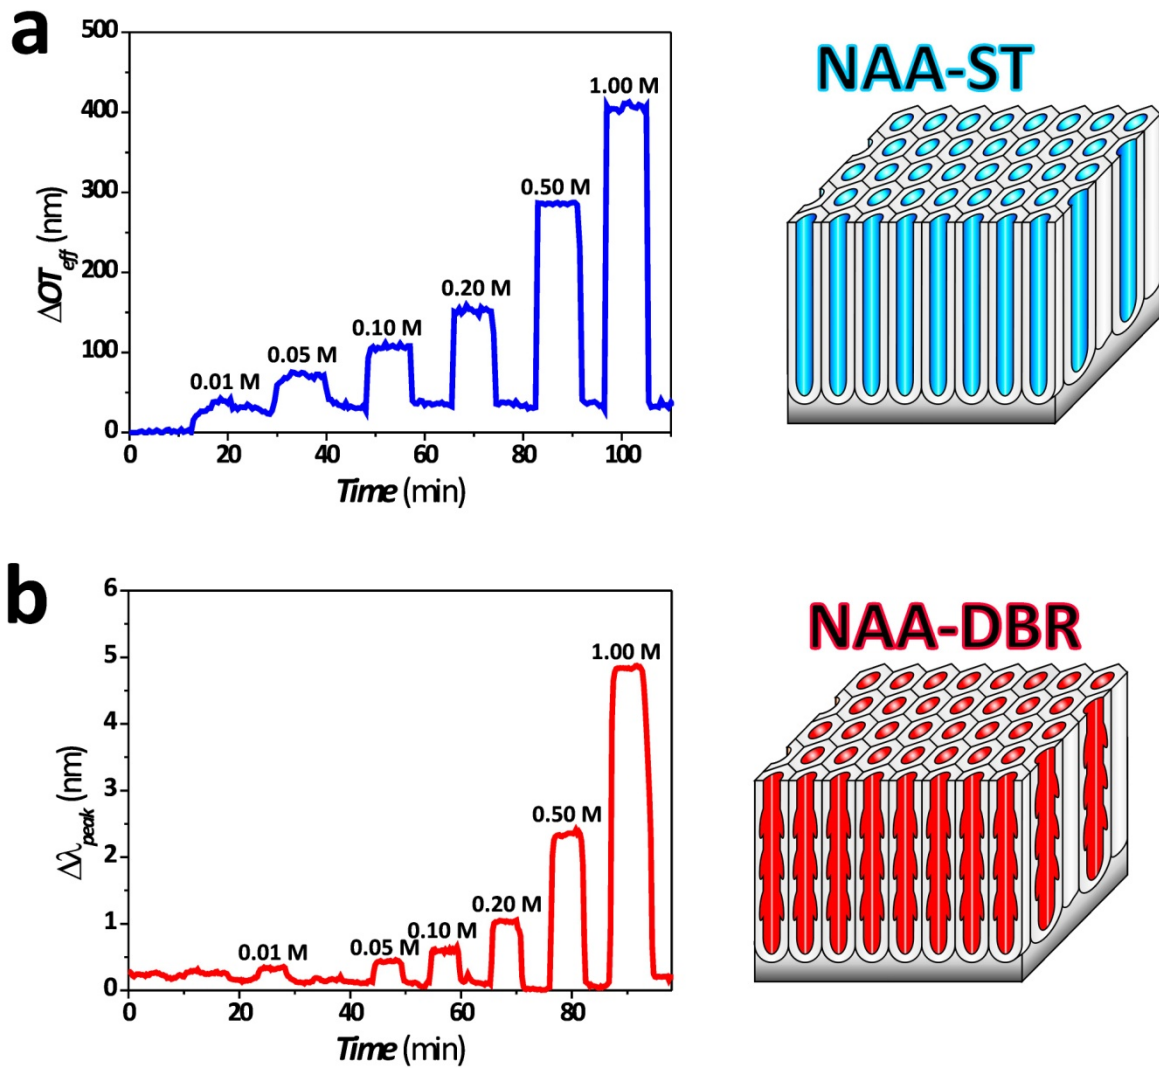

**Figure S2.** Examples of real-time monitoring of the effective medium change in NAA-ST and NAA-RF platforms as a result of infiltration of glucose solutions of different concentrations.
